# Supplementary material
Source: publisher figshare collection journal article supplement (https://tandf.figshare.com/ndownloader/files/16700330)

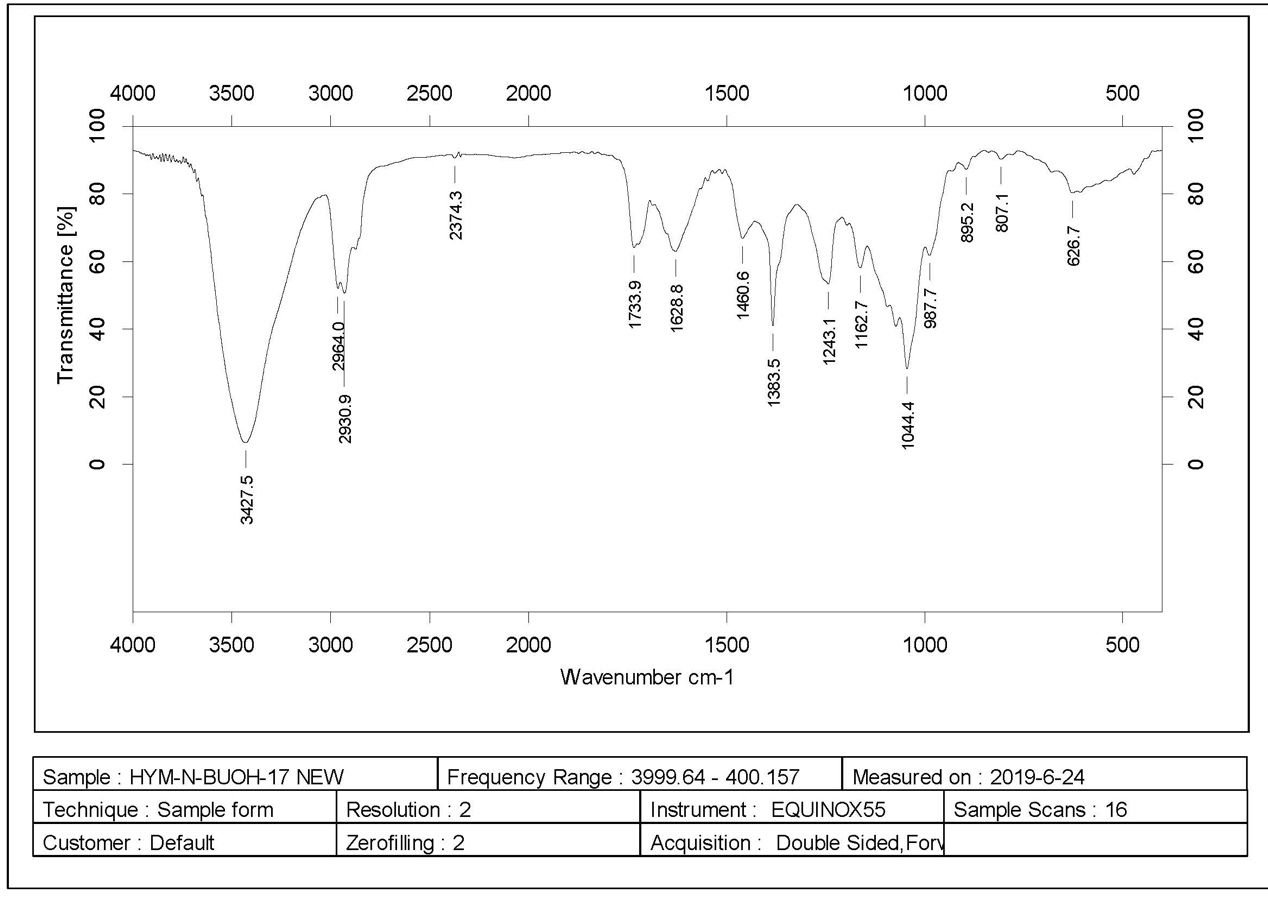

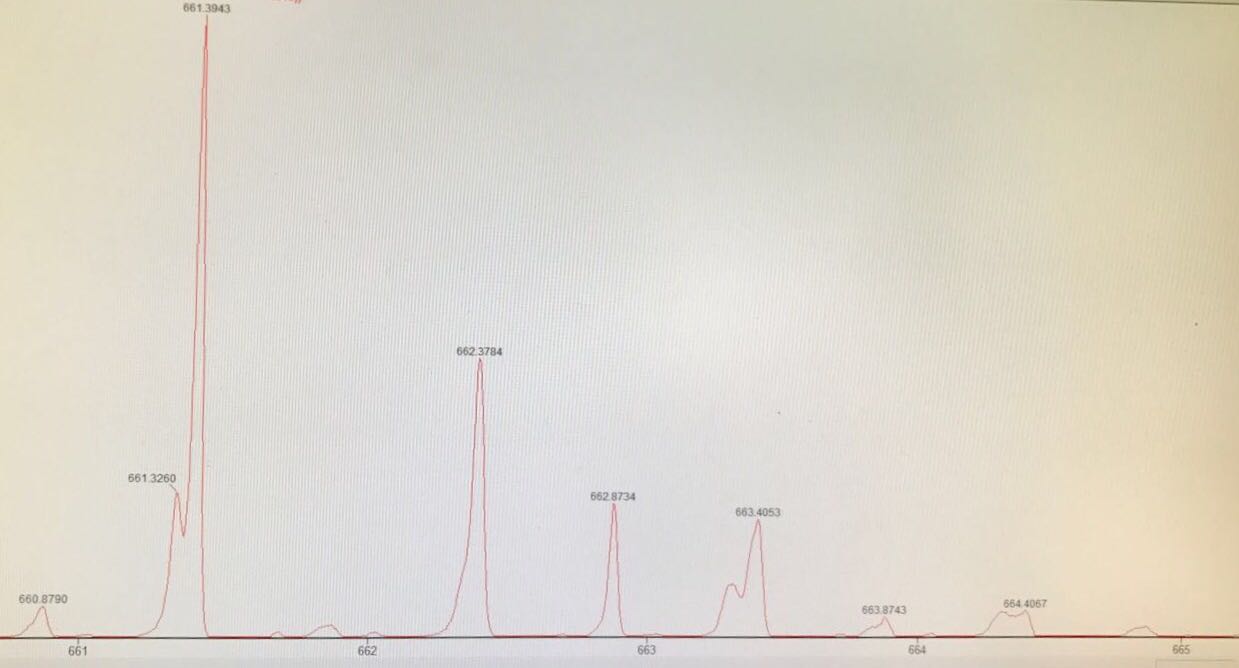

Supplement: Supplementary file 1 [file 16700330]
